# Supplementary material
Source: PubMed Central journal article supplement (PMC8111995)

Start of vaccine distribution

- March 2019
- July 2019
- August 2019
- September 2019
- October 2019
- November 2019
- December 2019–March 2020

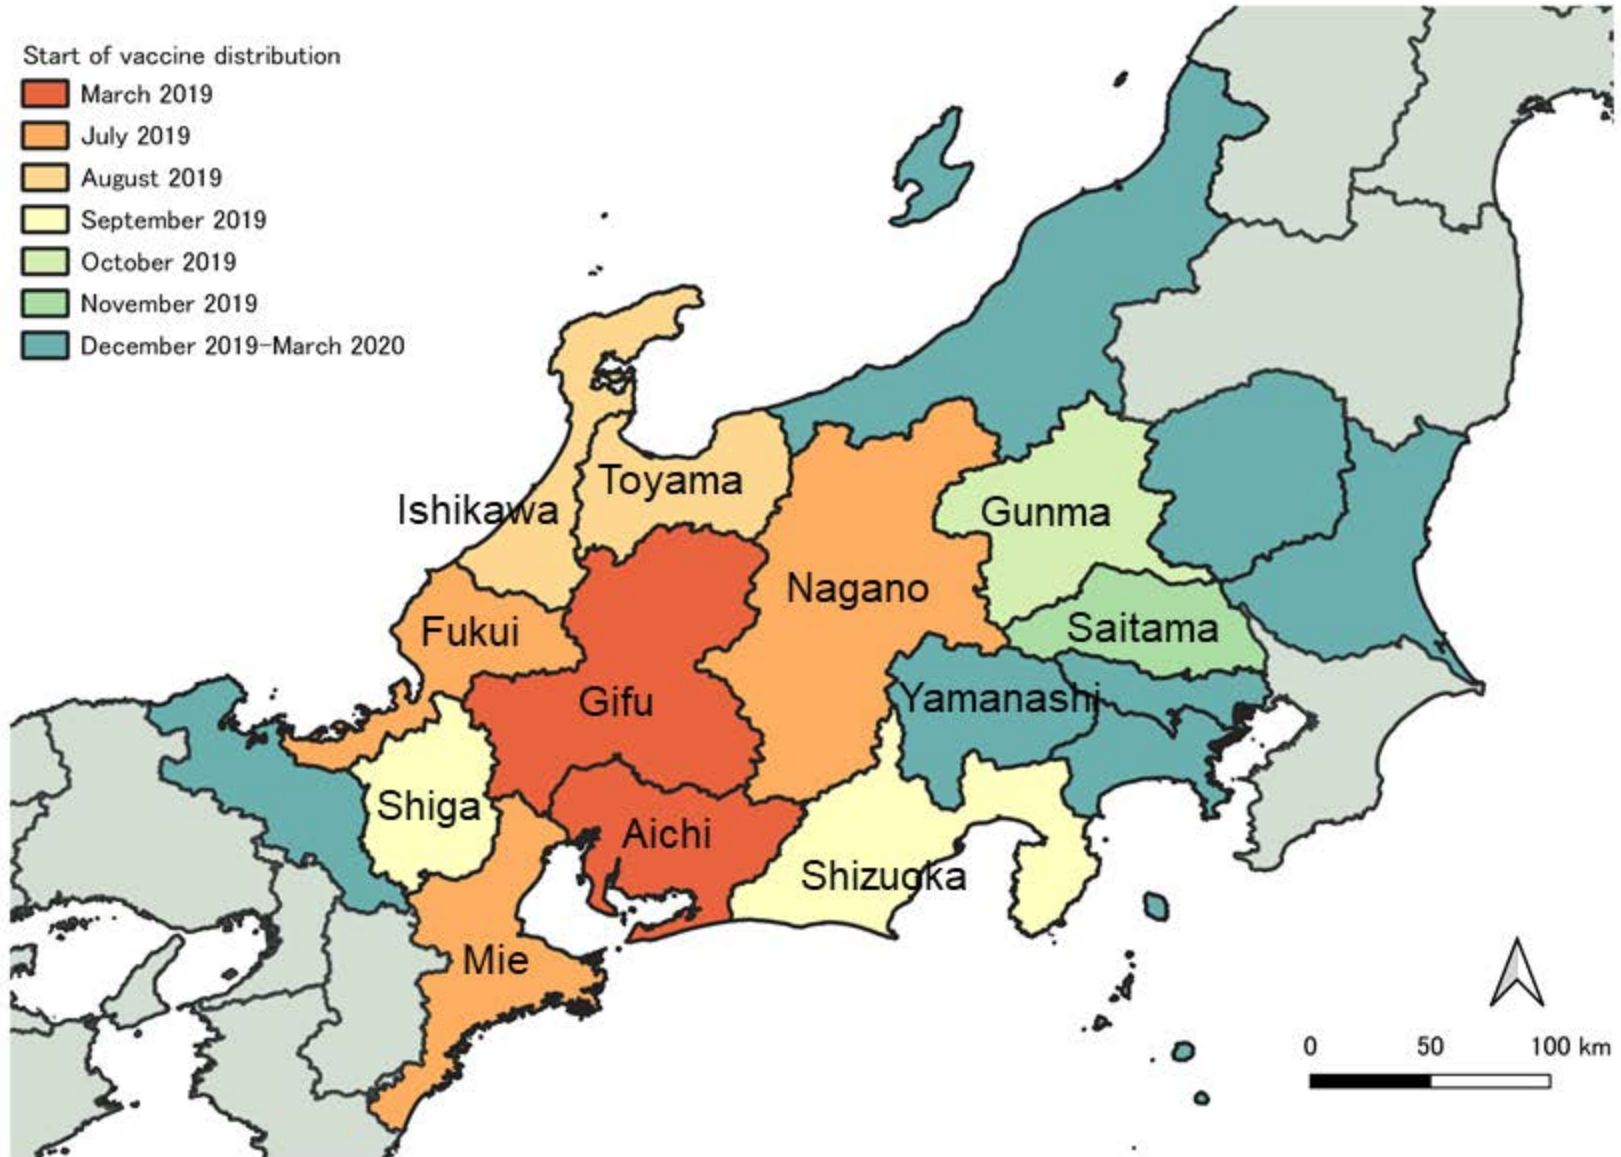

Supplement: 12917_2021_2891_MOESM1_ESM.pdf [file 12917_2021_2891_MOESM1_ESM.pdf]
