# Supplementary material
Source: PubMed Central journal article supplement (PMC8111995)

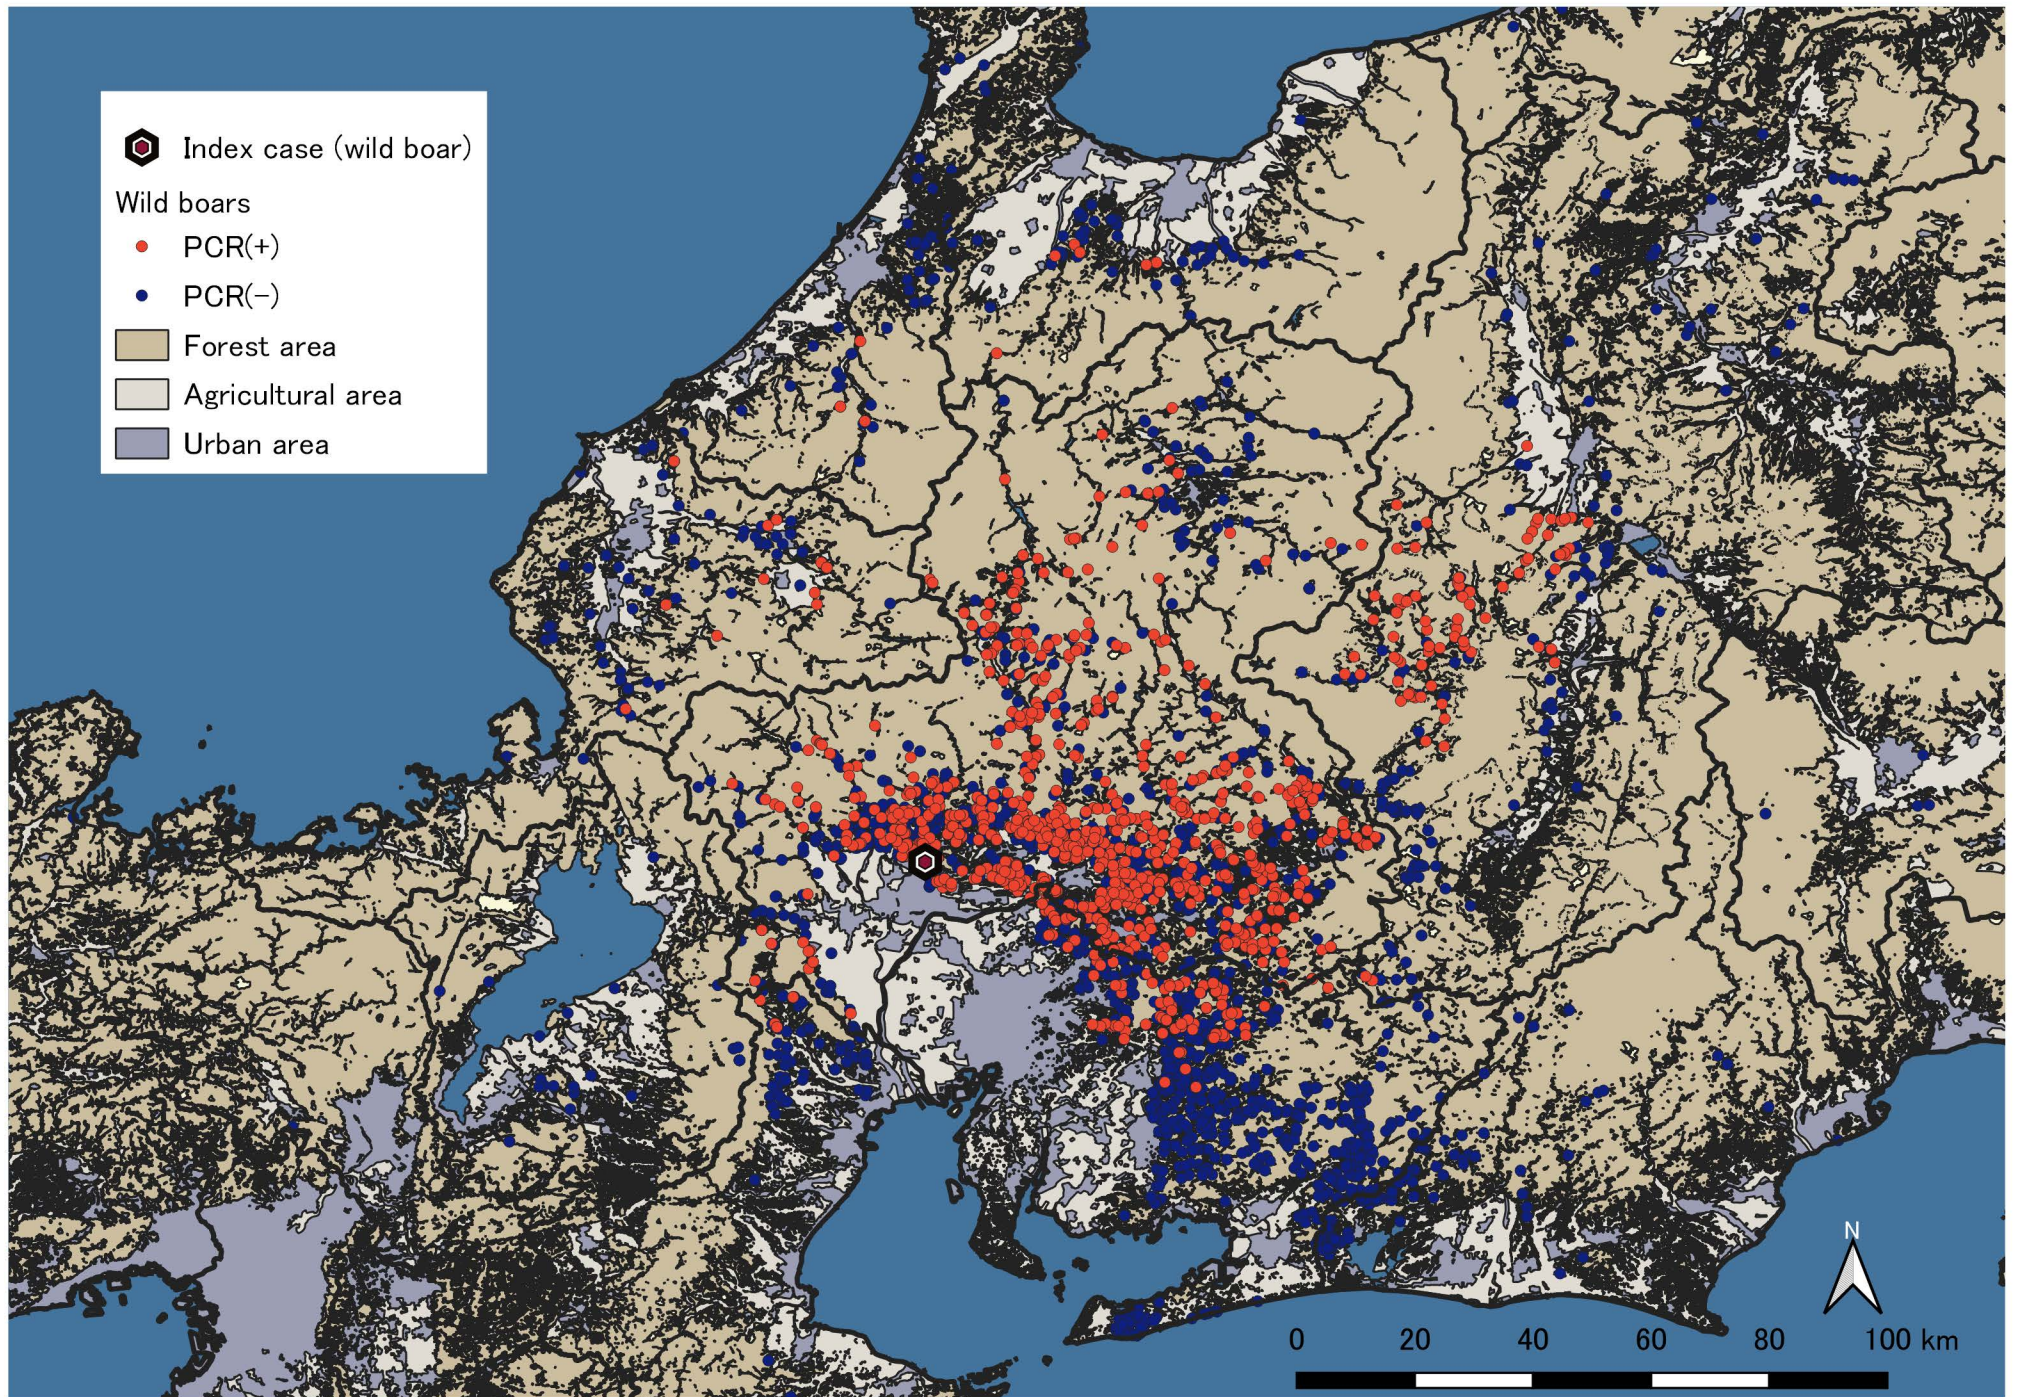

Supplement: 12917_2021_2891_MOESM2_ESM.pdf [file 12917_2021_2891_MOESM2_ESM.pdf]
